# Supplementary material
Source: Springer Nature journal article supplement (https://cris.unibo.it/retrieve/handle/11585/1053453/777dcec8-fb88-4b63-bdfd-f414bce29cde/41598_2025_34142_MOESM1_ESM.pdf)

# ASSEMBLY PROCEDURE'S SUMMARY

| Robot Action                                | ROBOT | HUMAN | Human Action                                                    |
|---------------------------------------------|-------|-------|-----------------------------------------------------------------|
| Pick and place 1st angular element          | R1    | H1    | Pick and place base wall                                        |
| Pick and place 2nd angular element          | R2    | H2    | Insert 1st angular element and bottom wall                      |
| Preparation to hold the side wall           | R3    | H3    | Insert 2nd angular element and 1st side wall                    |
| Holds the side wall                         | R4    | H4    | Insert the screws to fix the side wall                          |
| Pick and place 3rd and 4th angular elements | R5    | H5    | Insert the marker inside th box and rotate the box              |
| Preparation to hold the side wall           | R6    | H6    | Insert 3rd and 4th angular element and insert the 2nd side wall |
| Holds the side wall                         | R7    | H7    | Insert the screws to fix the side walls                         |
| Goes back to initial position               | R8    | H8    | Places the assembled box in the conveyor belt                   |

## BOX STRUCTURAL ELEMENTS

Base

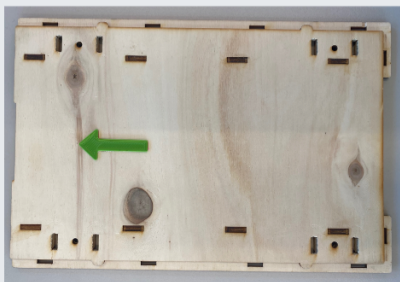

Side Wall

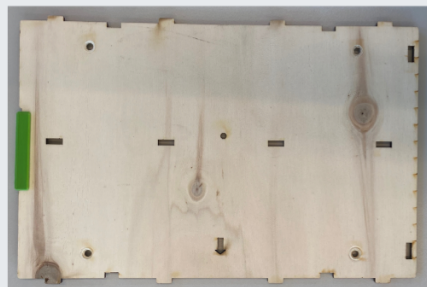

Bottom Wall

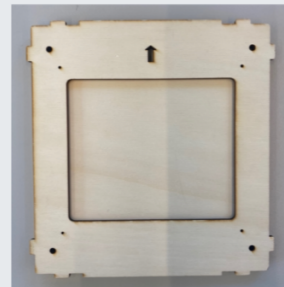

Angular Element

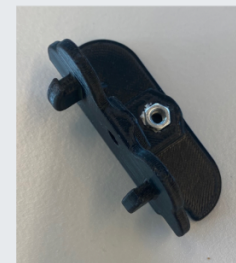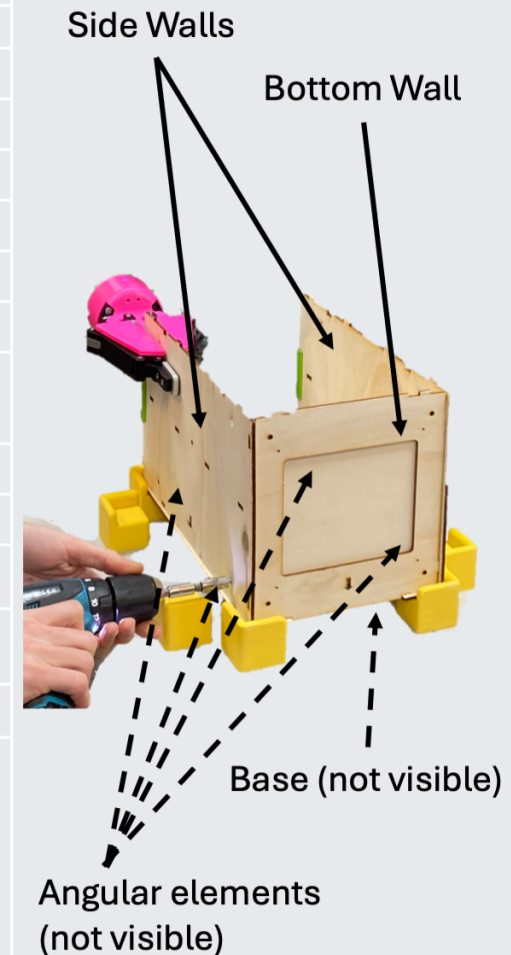

Supplement: MOESM1 [file 41598_2025_34142_MOESM1_ESM.pdf]
